# Supplementary material for: Activation and enhancement of Fredericamycin A production in deepsea-derived Streptomyces somaliensis SCSIO ZH66 by using ribosome engineering and response surface methodology
Source: PubMed Central journal article supplement (PMC4425903; doi:10.1186/s12934-015-0244-2), 2015-05-01
Supplement: 12934_2015_244_MOESM1_ESM.pdf [file 12934_2015_244_MOESM1_ESM.pdf]

## Supporting Information

### **Activation and enhancement of Fredericamycin A production in deepsea-derived *Streptomyces somaliensis* SCSIO ZH66 by using ribosome engineering and response surface methodology**

**Yonghe Zhang<sup>1†</sup>, Huiming Huang<sup>1†</sup>, Shanshan Xu<sup>1</sup>, Bo Wang<sup>2</sup>, Jianhua Ju<sup>2</sup>, Huarong Tan<sup>3</sup> and Wenli Li<sup>1\*</sup>**

<sup>1</sup> Key Laboratory of Marine Drugs, Ministry of Education of China, School of Medicine and Pharmacy, Ocean University of China, Qingdao 266003, China

<sup>2</sup> CAS Key Laboratory of Marine Bio-resources Sustainable Utilization, Guangdong Key Laboratory of Marine Materia Medica, RNAM Center for Marine Microbiology, South China Sea Institute of Oceanology, Chinese Academy of Sciences, 164 West Xingang Road, Guangzhou 510301, China

<sup>3</sup> State Key Laboratory of Microbial Resources, Institute of Microbiology, Chinese Academy of Sciences, Beijing 100101, China

<sup>†</sup> These authors contributed equally to this work.

<sup>\*</sup> Author to whom correspondence should be addressed

Email addresses:

YZ: zhangyonghe1990@163.com

HH: hmhuang1988@163.com

XS: xushanshan328@163.com

BW: wangbo@scsio.ac.cn

JJ: jju@scsio.ac.cn

TH: tanhr@im.ac.cn

WL: liwenli@ouc.edu.cn

## Table of contents

| No. |                                                                                                             | Page |
|-----|-------------------------------------------------------------------------------------------------------------|------|
| 1.  | <b>Table S1</b> Fermentation media used for detecting FDM A production by strain ZH66-RIF1.                 | S3   |
| 2.  | <b>Table S2</b> $^1\text{H}$ and $^{13}\text{C}$ NMR data of FDM A in $\text{DMSO-}d_6$ .                   | S4   |
| 3.  | <b>Table S3</b> FDM A titers from different producing strains.                                              | S5   |
| 4.  | <b>Table S4</b> The <i>frd</i> biosynthetic gene cluster from <i>S. somaliensis</i> SCSIO ZH66.             | S6   |
| 5.  | <b>Table S5</b> The primer pairs used in this study.                                                        | S7   |
| 6.  | <b>Table S6</b> Screening of significant variables for FDM A production using Plackett-Burman Design (PBD). | S7   |
| 7.  | <b>Table S7</b> The effects of each factor on FDM A production.                                             | S8   |
| 8.  | <b>Table S8</b> The dose of important factors in response surface analysis.                                 | S8   |
| 9.  | <b>Table S9</b> Analysis of variance (ANOVA) for the second-order polynomial model.                         | S8   |
| 10. | <b>Figure S1</b> Phylogenetic tree of <i>S. somaliensis</i> SCSIO ZH66 based on 16S rRNA sequences.         | S9   |
| 11. | <b>Figure S2</b> Phenotypes of strain ZH66-WT and strain ZH66-RIF1.                                         | S9   |
| 12. | <b>Figure S3</b> HPLC traces of fermentation products of strain ZH66-RIF1 in different medium.              | S10  |
| 13. | <b>Figure S4</b> UV spectrum of FDM A.                                                                      | S10  |
| 14. | Reference                                                                                                   | S11  |

**Table S1** Fermentation media used for detecting FDM A production by strain ZH66-RIF1.

| Name                | Recipe                                                                                                                                                                                                                                                                                                 |
|---------------------|--------------------------------------------------------------------------------------------------------------------------------------------------------------------------------------------------------------------------------------------------------------------------------------------------------|
| 1.medium-1          | peptone 2 g/L, yeast extract 5 g/L, soluble starch 2 g/L, soy flour 15 g/L, NaCl 4 g/L, CaCO <sub>3</sub> 4 g/L, sea salt 33 g/L, pH=7.0                                                                                                                                                               |
| 2.medium-2<br>(APM) | yeast extract 8 g/L, malt extract 20 g/L, NaCl 2g/L, MOPS sodium salt 10 g/L in 500 mL of tap water and 380 mL of Milli-Q water. After autoclaving, 1 mL of 10% MgSO <sub>4</sub> , 1 mL of 1% FeSO <sub>4</sub> , 0.1 mL of 10% ZnSO <sub>4</sub> and 120 mL of 50% glucose were added <sup>[1]</sup> |
| 3.medium-3          | soluble starch 10 g/L, glucose 20 g/L, corn syrup 4 g/L, yeast extract 10 g/L, beef extract 3 g/L, MgSO <sub>4</sub> •7H <sub>2</sub> O 0.5 g/L, KH <sub>2</sub> PO <sub>4</sub> 0.5 g/L, CaCO <sub>3</sub> 2 g/L, sea salt 30 g/L, pH=7.0                                                             |
| 4.medium-4          | soluble starch 20 g/L, soy flour 5 g/L, yeast extract 5 g/L, peptone 2 g/L, NaCl 4 g/L, CaCO <sub>3</sub> 2 g/L, sea salt 33 g/L, pH=7.2~7.4                                                                                                                                                           |
| 5.medium-5          | malt extraction powder 40 g/L, yeast extract powder 4 g/L, glucose 20 g/L, (NH <sub>4</sub> ) <sub>2</sub> HPO <sub>4</sub> 1 g/L, pH=7.0                                                                                                                                                              |

**Table S2**  $^1\text{H}$  and  $^{13}\text{C}$  NMR data of FDM A in  $\text{DMSO-}d_6$ .

| Position             | $\delta_{\text{C}}$ | $\delta_{\text{H}}$ (multiplicity, $J$ , Hz) |
|----------------------|---------------------|----------------------------------------------|
| 1                    | 167.17              |                                              |
| 2                    | 111.11              |                                              |
| 3                    | 156.35              |                                              |
| 4                    | 124.31              |                                              |
| 5                    | 64.65               |                                              |
| 6                    | 198.79              |                                              |
| 7                    | 134.80              |                                              |
| 8                    | 152.08              |                                              |
| 9                    | 118.87              |                                              |
| 10                   | 183.42              |                                              |
| 11                   | 162.02              |                                              |
| OCH <sub>3</sub> -11 | 57.92               | 3.99 (3H)                                    |
| 12                   | 112.26              |                                              |
| 13                   | 189.93              |                                              |
| 14                   | 109.18              |                                              |
| 15                   | 151.68              |                                              |
| 16                   | 134.20              |                                              |
| 17                   | 198.82              |                                              |
| 18                   | 34.86               | 2.47(t, $J = 7.5$ , 2H)                      |
| 19                   | 32.69               | 3.15(t, $J = 7.5$ , 2H)                      |
| 20                   | 154.61              |                                              |
| 21                   | 112.26              | 6.99 (s, 1H)                                 |
| 22                   | 140.34              |                                              |
| 23                   | 106.55              | 6.68 (s, 1H)                                 |
| 24                   | 138.30              |                                              |
| -NH                  |                     | 11.58 (s, 1H)                                |
| 25                   | 122.62              | 6.20 (ddq, $J = 15.4$ , 8.9 Hz, 1H)          |
| 26                   | 133.29              | 7.13 (dd, $J = 15.8$ , 10.4 Hz, 1H)          |
| 27                   | 131.69              | 6.23(d, $J = 15.4$ , 1H)                     |
| 28                   | 138.30              | 5.91 (dd, $J = 14.8$ , 7.2 Hz, 1H)           |
| 29                   | 18.60               | 1.79 (d, $J = 6.8$ Hz, 3H)                   |
| OH-3                 |                     | 13.13 (s, 1H)                                |

**Table S3. FDM A titers from different producing strains**

| Strain                                            | Culture conditions                |                                                                                                                                                                                                   |              | Titer (mg/L)   |
|---------------------------------------------------|-----------------------------------|---------------------------------------------------------------------------------------------------------------------------------------------------------------------------------------------------|--------------|----------------|
|                                                   | Seed medium                       | Production medium                                                                                                                                                                                 | Time (days)  |                |
| <i>S. chattanoogensis</i> ISP 5002 <sup>[2]</sup> | galactose<br>-glycerol-corn steep | L-phenylalanine 5 g/L, (NH <sub>4</sub> ) <sub>2</sub> SO <sub>4</sub> 1.5 g/L, K <sub>2</sub> HPO <sub>4</sub> 0.5 g/L, KH <sub>2</sub> PO <sub>4</sub> 0.5 g/L, CaCO <sub>3</sub> 2 g/L, pH=7.0 | 6            | 10             |
| <i>S. griseus</i> ATCC49344 <sup>[3]</sup>        |                                   |                                                                                                                                                                                                   | 9-10         | 162            |
| <i>S. griseus</i> SB4012 <sup>[3]</sup>           | R2YE                              | APM (medium-2)                                                                                                                                                                                    | 11-12<br>8-9 | 997<br>400     |
| <i>S. somaliensis</i> SCSIO ZH66-RIF1             | -<br>-                            | medium-3<br>optimized medium-3                                                                                                                                                                    | 7<br>7       | 220.9<br>679.5 |

**Table S4** Proposed functions of proteins encoded by the *frd* biosynthetic gene cluster from *S. somaliensis* SCSIO ZH66 and its comparison with other FDM A gene clusters.

| SCSIO ZH66 |           |                                   | Comparison of ant gene cluster from other strains |                  |                          |                                    |                  |                          |
|------------|-----------|-----------------------------------|---------------------------------------------------|------------------|--------------------------|------------------------------------|------------------|--------------------------|
| Protein    | Size (aa) | Proposed function                 | <i>Streptomyces griseus</i>                       |                  |                          | <i>Streptomyces</i> sp. SANK 61196 |                  |                          |
|            |           |                                   | protein                                           | Accession number | Identity (%) /Similarity | protein                            | Accession number | Identity (%) /Similarity |
| FrdC       | 246       | putative 3-ketoacyl-ACP reductase | FmdC                                              | AAQ08912         | 99/99                    | SanC                               | ADG86311         | 83/90                    |
| FrdT       | 493       | putative peptide transporter      | FmdT                                              | AAQ08913         | 99/99                    | SanT                               | ADG86312         | 82/89                    |
| FrdD       | 106       | putative polyketide cyclase       | FmdD                                              | AAQ08914         | 100/100                  | SanD                               | ADG86313         | 89/94                    |
| FrdE       | 141       | putative polyketide cyclase       | FmdE                                              | AAQ08915         | 100/100                  | SanE                               | ADG86314         | 83/88                    |
| FrdF       | 416       | 3-ketoacyl-ACP synthase           | FmdF                                              | AAQ08916         | 99/99                    | SanF                               | ADG86315         | 92/96                    |
| FrdG       | 403       | chain length factor               | FmdG                                              | AAQ08917         | 99/99                    | SanG                               | ADG86316         | 84/90                    |
| FrdH       | 84        | ACP                               | FmdH                                              | AAQ08918         | 100/100                  | SanH                               | ADG86317         | 80/89                    |
| FrdI       | 155       | putative polyketide cyclase       | FmdI                                              | AAQ08919         | 99/100                   | SanI                               | ADG86318         | 83/89                    |
| FrdJ       | 101       | putative monooxygenase            | FmdJ                                              | AAQ08920         | 99/100                   | SanJ                               | ADG86319         | 73/81                    |
| FrdK       | 142       | putative oxygenase                | FmdK                                              | AAQ08921         | 99/100                   | SanK                               | ADG86320         | 80/87                    |
| FrdL       | 246       | putative monooxygenase            | FmdL                                              | AAQ08922         | 100/100                  | SanL                               | ADG86321         | 78/87                    |
| FrdM       | 148       | putative monooxygenase            | FmdM                                              | AAQ08923         | 99/100                   | SanM                               | ADG86322         | 83/89                    |
| FrdM1      | 154       | putative monooxygenase            | FmdM1                                             | AAQ08924         | 99/99                    | SanM1                              | ADG86323         | 81/87                    |
| FrdN       | 320       | putative o-methyltransferase      | FmdN                                              | AAQ08925         | 98/99                    | SanN                               | ADG86324         | 78/84                    |
| FrdO       | 249       | putative 3-ketoacyl-ACP reductase | FmdO                                              | AAQ08926         | 99/100                   | SanO                               | ADG86325         | 88/94                    |
| FrdP       | 98        | putative monooxygenase            | FmdP                                              | AAQ08927         | 99/100                   | SanP                               | ADG86326         | 81/92                    |
| FrdQ       | 105       | putative monooxygenase            | FmdQ                                              | AAQ08928         | 99/100                   | SanQ                               | ADG86327         | 74/83                    |
| FrdS       | 333       | putative 3-keto-acyl-ACP synthase | FmdS                                              | AAQ08929         | 99/99                    | SanS                               | ADG86328         | 86/92                    |
| FrdT1      | 302       | putative membrane transporter     | FmdT1                                             | AAQ08930         | 100/100                  | SanT1                              | ADG86329         | 87/93                    |
| -          | -         | -                                 | -                                                 | -                | -                        | SanX                               | ADG86330         | -                        |
| FrdR       | 151       | transcriptional regulator         | FmdR                                              | AAQ08931         | 100/100                  | SanR                               | ADG86331         | 80/90                    |
| FrdU       | 141       | unknown                           | FmdU                                              | AAQ08932         | 99/99                    | SanU                               | ADG86332         | 62/76                    |
| FrdV       | 622       | asparagine synthetase             | FmdV                                              | AAQ08933         | 99/99                    | SanV                               | ADG86333         | 78/83                    |
| FrdR1      | 580       | regulatory protein                | FmdR1                                             | AAQ08934         | 99/100                   | SanR1                              | ADG86334         | 73/81                    |
| FrdT2      | 531       | putative membrane transporter     | FmdT2                                             | AAQ08935         | 99/99                    | SanT2                              | ADG86335         | 78/83                    |
| FrdW       | 159       | holo-ACP synthase                 | FmdW                                              | AAQ08936         | 99/99                    | SanW                               | ADG86336         | 69/75                    |
| FrdR2      | 170       | transcriptional regulator         | FmdR2                                             | AAQ08937         | 99/99                    | -                                  | -                | -                        |
| -          | -         | -                                 | FmdX                                              | AAQ08938         | -                        | -                                  | -                | -                        |
| FrdT3      | 525       | putative membrane transporter     | FmdT3                                             | AAQ08939         | 99/99                    | -                                  | -                | -                        |

-: means not available.

**Table S5.** The primer pairs used in this study.

| Name                 | Sequence (5'-3') <sup>a</sup>        |
|----------------------|--------------------------------------|
| 16S-FP               | AGAGTTTGATCCTGGCTCAG                 |
| 16S-RP               | AAGGAGGTGATCCAGCCGCA                 |
| rpoB-FP <sup>a</sup> | <u>CGGGATCC</u> TTGGCCGCTCGCGCACT    |
| rpoB-RP <sup>a</sup> | CC <u>CAAGCTT</u> TCAGACCTCTTCGACGCT |
| hrdB-FP              | CGACTACACCAAGGGCTACAA                |
| hrdB-RP              | GGAGCATCTGACGCTGGAC                  |
| frdD-FP              | GGAGCCGGGTGTTGATGT                   |
| frdD-RP              | GACGACGCCGACAAGGTG                   |
| frdR1-FP             | GCACCGAAGGTCCGACAAGTT                |
| frdR1-RP             | CGCAGAGTCCGGGCAGTTT                  |

<sup>a</sup>Underlined letters represent restriction sites.

**Table S6** Screening of significant variables for FDM A production using Plackett-Burman Design (PBD)

| Treatments | Variable Level |       |       |       |       |       |       |       |       | FDM A titer<br>(mg/L) |
|------------|----------------|-------|-------|-------|-------|-------|-------|-------|-------|-----------------------|
|            | $X_1$          | $X_2$ | $X_3$ | $X_4$ | $X_5$ | $X_6$ | $X_7$ | $X_8$ | $X_9$ |                       |
| 1          | -1             | 1     | 1     | -1    | -1    | -1    | 1     | 1     | 1     | 436.57±11.85          |
| 2          | -1             | -1    | -1    | -1    | -1    | -1    | -1    | -1    | -1    | 522.02±6.24           |
| 3          | 1              | 1     | 1     | -1    | 1     | 1     | -1    | 1     | -1    | 308.29±24.23          |
| 4          | -1             | -1    | -1    | 1     | 1     | 1     | -1    | 1     | 1     | 373.82±13.66          |
| 5          | -1             | 1     | -1    | -1    | 1     | 1     | 1     | -1    | 1     | 481.57±26.23          |
| 6          | -1             | -1    | 1     | 1     | 1     | -1    | 1     | 1     | -1    | 385.65±15.51          |
| 7          | 1              | -1    | 1     | -1    | 1     | -1    | -1    | -1    | 1     | 252.64±4.92           |
| 8          | -1             | 1     | 1     | 1     | -1    | 1     | -1    | -1    | -1    | 563.54±11.04          |
| 9          | 1              | 1     | -1    | 1     | 1     | -1    | 1     | -1    | -1    | 507.76±14.34          |
| 10         | 1              | 1     | -1    | 1     | -1    | -1    | -1    | 1     | 1     | 346.15±5.80           |
| 11         | 1              | -1    | 1     | 1     | -1    | 1     | 1     | -1    | 1     | 242.87±16.44          |
| 12         | 1              | -1    | -1    | -1    | -1    | 1     | 1     | 1     | -1    | 174.59±13.76          |

$X_1$ , soluble starch at a low level (-1) of 8 g/L and a high level (+1) of 12 g/L;  $X_2$ , glucose at a low level (-1) of 16 g/L and a high level (+1) of 24 g/L;  $X_3$ , at a low level (-1) of 3.2 g/L and a high level (+1) of 4.8 g/L;  $X_4$ , at a low level (-1) of 8 g/L and a high level (+1) of 12 g/L;  $X_5$ , at a low level (-1) of 2.4 g/L and a high level (+1) of 3.6 g/L;  $X_6$ , at a low level (-1) of 2.4 g/L and a high level (+1) of 3.6 g/L;  $X_7$ , at a low level (-1) of 0.4 g/L and a high level (+1) of 0.6 g/L;  $X_8$ , at a low level (-1) of 0.4 g/L and a high level (+1) of 0.6 g/L;  $X_9$ , at a low level (-1) of 24 g/L and a high level (+1) of 36 g/L.

**Table S7** The effects of each factor on FDM A production.

| Factor signs | Factor                               | Effect  | Coefficient | <i>t</i> Value | <i>p</i> Value |
|--------------|--------------------------------------|---------|-------------|----------------|----------------|
| $X_1$        | Starch soluble                       | -148.64 | -74.32      | -4.62          | 0.044          |
| $X_2$        | Glucose                              | 128.88  | 64.44       | 4.00           | 0.057          |
| $X_3$        | Corn syrup                           | -42.89  | -21.45      | -1.33          | 0.314          |
| $X_4$        | Yeast extract                        | 17.50   | 8.75        | 0.54           | 0.641          |
| $X_5$        | Beef extract                         | 53.85   | 26.93       | 1.67           | 0.236          |
| $X_6$        | CaCO <sub>3</sub>                    | -64.18  | -32.09      | -1.99          | 0.184          |
| $X_7$        | MgSO <sub>4</sub> ·7H <sub>2</sub> O | -16.07  | -8.04       | -0.50          | 0.667          |
| $X_8$        | KH <sub>2</sub> PO <sub>4</sub>      | -104.39 | -52.19      | -3.24          | 0.083          |
| $X_9$        | Sea salt                             | -61.20  | -30.60      | -1.90          | 0.198          |

$R^2 = 96.80\%$ ;  $R^2_{adj} = 95.42\%$ .

**Table S8** The dose of important factors in response surface analysis.

| Level | Glucose (g/L) | Starch soluble (g/L) | KH <sub>2</sub> PO <sub>4</sub> (g/L) |
|-------|---------------|----------------------|---------------------------------------|
| -1    | 22            | 5                    | 0.28                                  |
| 0     | 26            | 7                    | 0.35                                  |
| 1     | 30            | 9                    | 0.42                                  |

**Table S9** Analysis of variance (ANOVA) for the second-order polynomial model.

| Source        | DF | SS     | <i>F</i> -value | <i>p</i> -value |
|---------------|----|--------|-----------------|-----------------|
| Model         | 9  | 174647 | 62.72           | 0.000           |
| Linear        | 3  | 139635 | 150.43          | 0.000           |
| Quadratic     | 3  | 31432  | 33.86           | 0.001           |
| Cross product | 3  | 3581   | 3.86            | 0.090           |
| Residual      | 5  | 1547   |                 |                 |
| Lack of Fit   | 3  | 1353   | 4.63            | 0.183           |
| Pure Error    | 2  | 195    |                 |                 |
| Total         | 14 | 176194 |                 |                 |

DF: degree of freedom; SS: sum of squares.



**Figure S1** Phylogenetic tree of *S. somaliensis* SCSIO ZH66 based on 16S rRNA sequences.

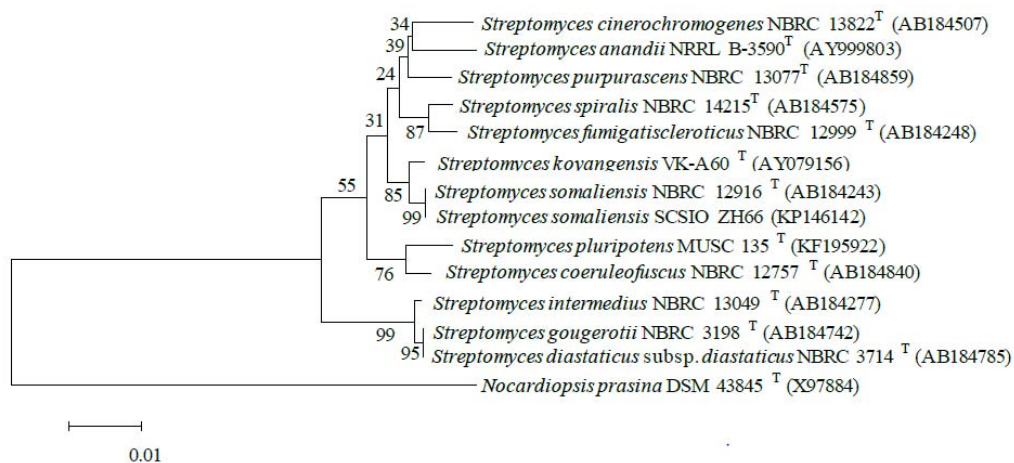

**Figure S2** Phenotypes of strain ZH66-WT and strain ZH66-RIF1. (A, B) surface view; (C, D) microscopic analysis. Strains were incubated on Gauze's No. 1 medium for 72 h at 30 °C. Bar, 5 μm.

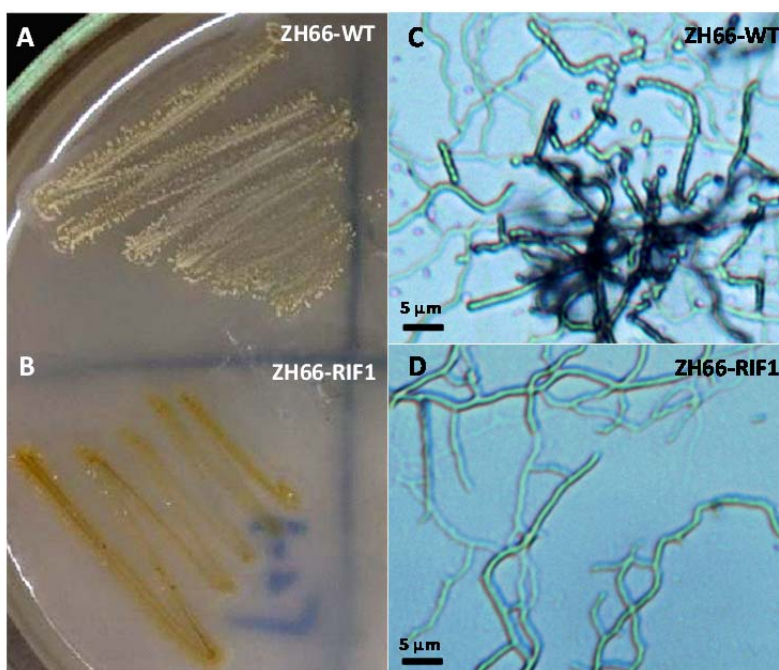

**Figure S3** HPLC traces of fermentation products of strain ZH66-RIF1 in different medium.

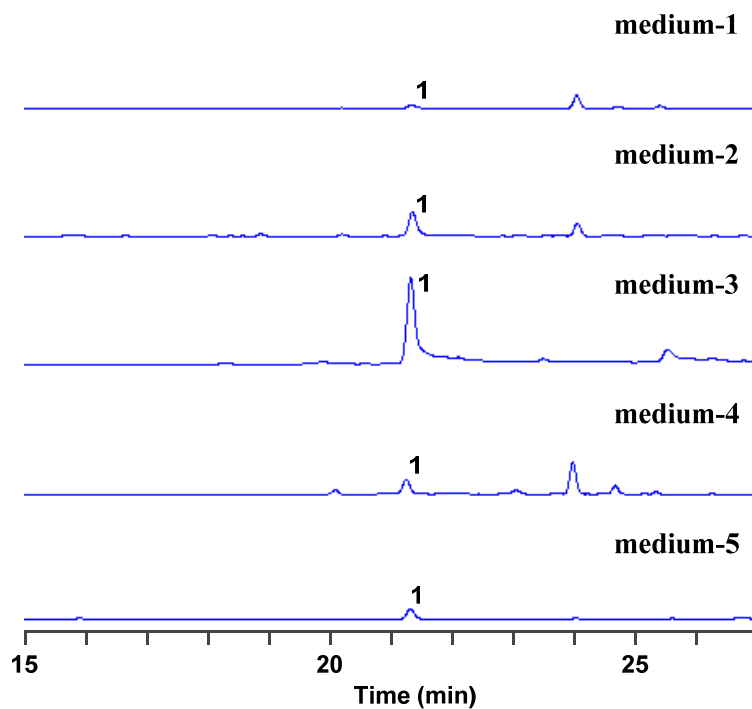

**Figure S4** UV spectrum of FDM A.

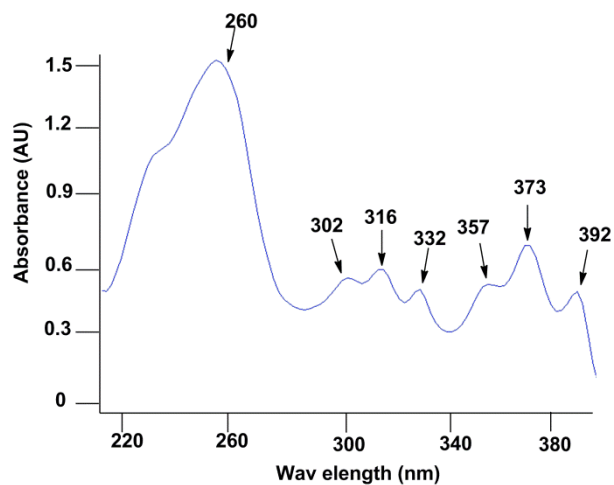

## References

1. Wendt-Pienkowski E, Huang Y, Zhang J, Li B, Jiang H, Kwon H, et al. Cloning, sequencing, analysis, and heterologous expression of the fredericamycin biosynthetic gene cluster from *Streptomyces griseus*. *J Am Chem Soc.* 2005; 127:16442-16452.
2. Hosoya Y, Okamoto S, Muramatsu H, Ochi K. Acquisition of certain streptomycin-resistant (*str*) mutations enhances antibiotic production in bacteria. *Antimicrob Agents Chemother.* 1998; 42(8):2041-2047.
3. Chen Y, Wendt-Pienkowski E, Shen B. Identification and utility of FdmR1 as a *Streptomyces* antibiotic regulatory protein activator for fredericamycin production in *Streptomyces griseus* ATCC 49344 and heterologous hosts. *J Bacteriol.* 2008; 190:5587-5596.
